# Supplementary material
Source: PubMed Central journal article supplement (PMC5969480)

**Supplemental Table 1.** Relative risk for *transition to each subsequent stage of CKD* by characteristics determined at the beginning of each stage of CKD.

| Characteristic**                        | Hazard ratio (95% CI) |                      |                     |                    |
|-----------------------------------------|-----------------------|----------------------|---------------------|--------------------|
|                                         | Stage 3a<br>(N=1432)  | Stage 3b<br>(N=2142) | Stage 4<br>(N=1695) | Stage 5<br>(N=741) |
| Age ≥60 years                           | 1.20 (1.02-1.41)      | 0.73 (0.64-0.83)*    | 0.64 (0.55-0.74)    | 0.76 (0.65-0.90)*  |
| Female (vs. male)                       | 1.08 (0.91-1.27)      | 0.85 (0.75-0.96)     | 0.85 (0.73-0.98)    | 0.80 (0.69-0.94)   |
| Race (vs. white)                        |                       |                      |                     |                    |
| Black                                   | 1.24 (1.03-1.49)      | 1.43 (1.24-1.64)     | 1.90 (1.58-2.29)    | 1.00 (0.82-1.21)   |
| Hispanic                                | 1.61 (1.21-2.15)      | 1.31 (1.08-1.59)     | 1.80 (1.42-2.27)    | 0.86 (0.67-1.09)*  |
| Other                                   | 1.51 (1.04-2.17)      | 1.15 (0.83-1.59)     | 1.75 (1.20-2.56)    | 1.21 (0.81-1.81)   |
| Diabetes                                | 1.59 (1.34-1.88)      | 1.20 (1.05-1.36)*    | 1.10 (0.93-1.29)*   | 1.25 (1.06-1.49)*  |
| Proteinuria ≥ 1g/g                      | 2.95 (2.43-3.57)      | 2.92 (2.55-3.35)     | 3.16 (2.69-3.73)*   | 1.67 (1.40-1.99)*  |
| Obese<br>(BMI ≥30 kg/m <sup>2</sup> )   | 1.01 (0.85-1.19)      | 0.95 (0.84-1.08)     | 0.98 (0.84-1.15)    | 0.91 (0.77-1.07)*  |
| Current smoker                          | 1.05 (0.82-1.35)      | 1.09 (0.91-1.29)     | 1.25 (1.03-1.52)    | 1.17 (0.93-1.46)   |
| Systolic blood<br>pressure ≥140<br>mmHg | 1.47 (1.23-1.77)      | 1.41 (1.23-1.60)     | 1.44 (1.23-1.69)    | 1.20 (1.02-1.42)   |
| ACE/ARB use                             | 1.17 (0.97-1.41)      | 0.94 (0.82-1.09)*    | 0.94 (0.79-1.10)    | 1.15 (0.98-1.36)   |

\*Statistically significant difference (p<0.05 for interaction) across CKD stages; Stage 3a is used as the reference in tests for interaction.

\*\*Missing covariates in N=5 for stage 3a; N=18 in CKD stage 3b; N=8 in CKD stage 4

**Appendix.** Prediction equations for median time to transition to each subsequent stage of CKD.

**Median time to transition from CKD stage 3a to 3b:**

$$A = 0.5336909 * \text{diabetes} + 1.133394 * \text{proteinuria} + 0.0048407 * \text{age} + 0.0724414 * \text{sex} + 0.4622898 * (\text{sbp}) - 2.819153$$

$$\text{Median time spent in CKD stage 3a} = (-\ln(0.5)) * e^{(-A)} * 1.272523$$

**Median time to transition from CKD stage 3b to 4:**

$$A = 0.2174867 * \text{diabetes} + 1.062451 * \text{proteinuria} - 0.0177396 * \text{age} - 0.1318289 * \text{sex} + 0.4512464 * (\text{sbp}) - 1.312139$$

$$\text{Median time spent in CKD stage 3b} = (-\ln(0.5)) * e^{(-A)} * 1.055524$$

**Median time to transition from CKD stage 4 to 5:**

$$A = 0.2039766 * \text{diabetes} + 1.235812 * \text{proteinuria} - 0.0241392 * \text{age} - 0.1096564 * \text{sex} + 0.5088881 * (\text{sbp}) - 2.513896$$

$$\text{Median time spent in CKD stage 4} = (-\ln(0.5)) * e^{(-A)} * 0.5198475$$

**Median time to transition from CKD stage 5 to ESRD:**

$$A = 0.2484453 * \text{diabetes} + 0.4460576 * \text{proteinuria} - 0.0191924 * \text{age} - 0.2310535 * \text{sex} + 0.2427223 * (\text{sbp}) + 0.5750078$$

$$\text{Median time spent in CKD stage 5} = (-\ln(0.5)) * e^{(-A)} * 0.9402173$$

diabetes = 1 if patient has diabetes; 0 if patient does not have diabetes

proteinuria = 1 if pro/cre ratio  $\geq$  1 g/g or 0 if pro/cre ratio  $<$  1 g/g

sex = 1 if female and 0 if male

sbp = 1 if systolic BP  $\geq$  140 mm Hg or 0 if systolic BP  $<$  140 mm Hg

**Supplemental Figure 1.** Fit of mixed models for eGFR trajectory in a subset of randomly selected CRIC participants.

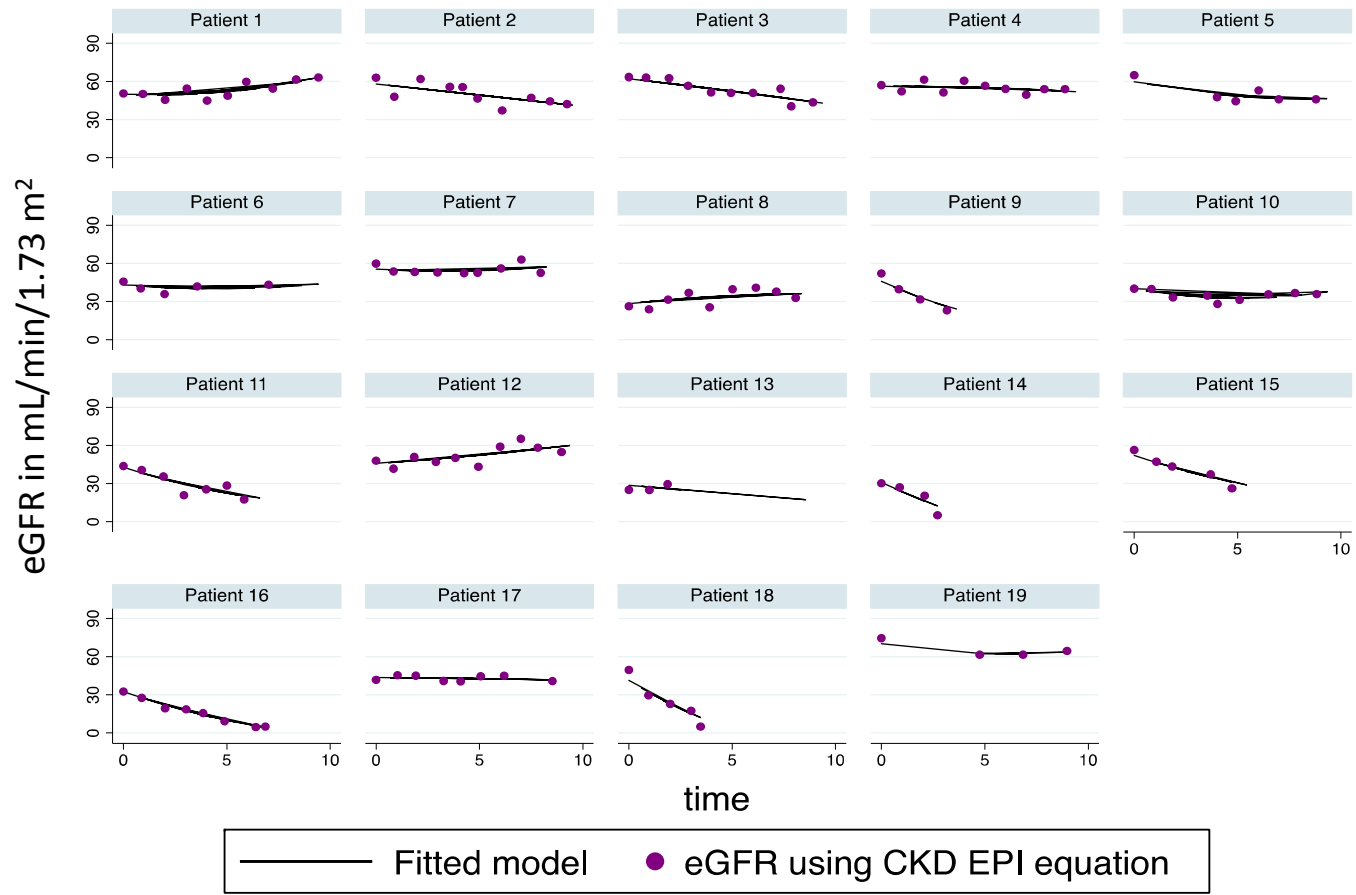

**Supplementary Figure 2.** Survival curves for various stages of CKD transitions among CRIC participants using Weibull parametric models.

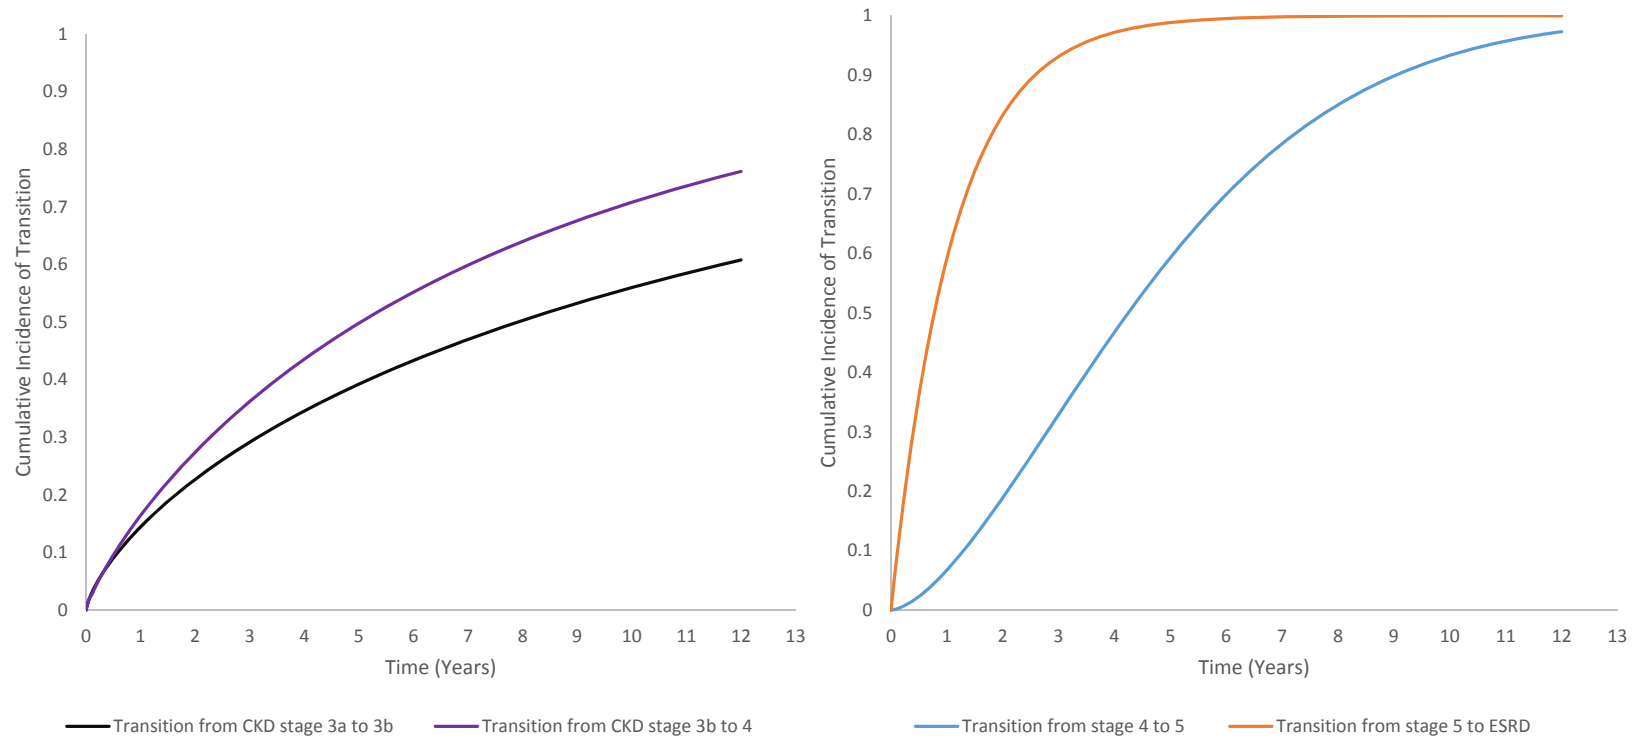

**Supplementary Figure 3.** Median time spent in each CKD stage based on Weibull parametric models.

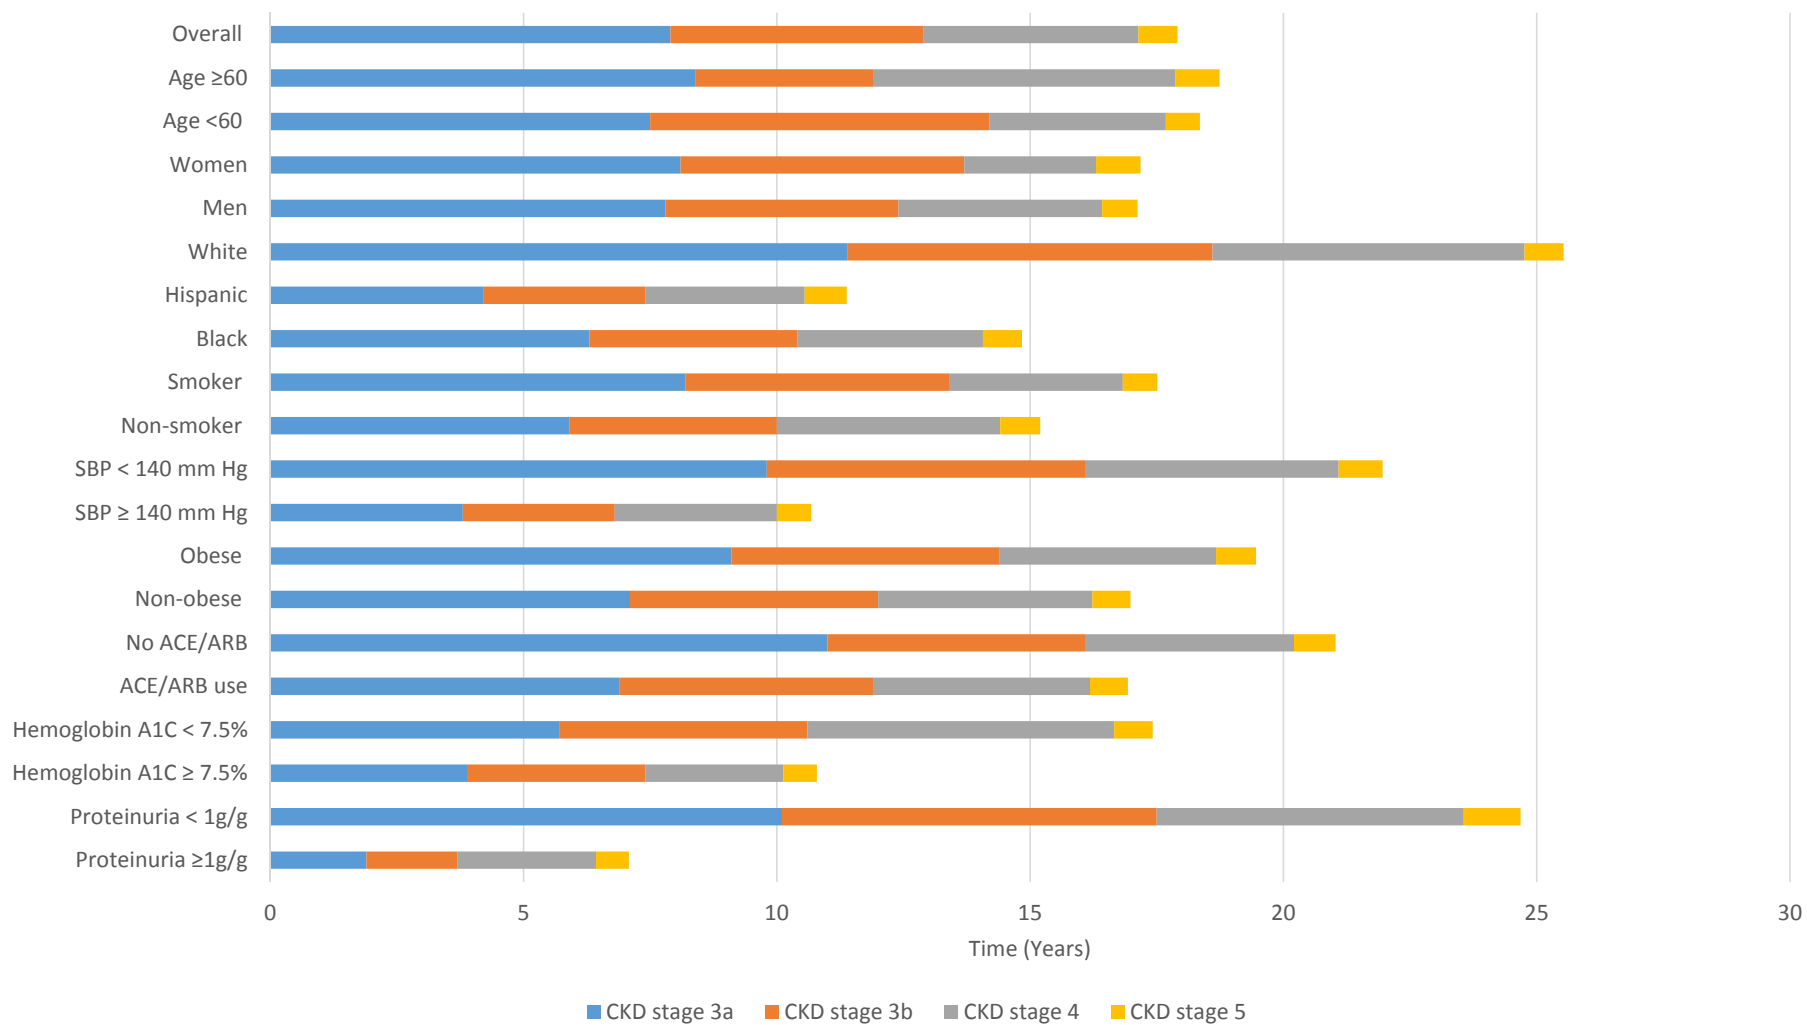

Supplement: CJN.10360917SupplementaryData.pdf [file CJN.10360917SupplementaryData.pdf]
